# Supplementary material for: Sour Gas Adsorption on Silica Gels
Source: PubMed Central journal article supplement — ACS Omega. 2023 Mar 22;8(13):12592–602. doi: 10.1021/acsomega.3c01366 (PMC10077463; doi:10.1021/acsomega.3c01366), 2023-03-22
Supplement: ao3c01366_si_001.pdf [file ao3c01366_si_001.pdf]

# **Sour gas adsorption on silica gels**

## **Supporting Information**

John H. Jacobs, Kaylan H. McKelvie, Safeer Nanji, Robert A. Marriott\*

Department of Chemistry, University of Calgary, 2500 University Drive, N.W., Calgary, AB  
T2N 1N4, Canada

\*rob.marriott@ucalgary.ca

**Table S1.** Methane adsorption data for the 22 Å pore size silica.

| $p$<br>/bar                                     | $n^{\text{abs}}$<br>/mmol g <sup>-1</sup> | $n^{\text{exc}}$<br>/mmol g <sup>-1</sup> |
|-------------------------------------------------|-------------------------------------------|-------------------------------------------|
| $T = -0.0219 \pm 0.006 \text{ } ^\circ\text{C}$ |                                           |                                           |
| 2.6990                                          | 0.527                                     | 0.432 ± 0.002                             |
| 5.5644                                          | 0.963                                     | 0.766 ± 0.004                             |
| 8.4473                                          | 1.342                                     | 1.041 ± 0.006                             |
| 11.2993                                         | 1.677                                     | 1.272 ± 0.008                             |
| 14.0792                                         | 1.979                                     | 1.471 ± 0.010                             |
| 16.7775                                         | 2.253                                     | 1.644 ± 0.012                             |
| 19.3844                                         | 2.504                                     | 1.795 ± 0.014                             |
| 21.8833                                         | 2.736                                     | 1.931 ± 0.016                             |
| 24.2856                                         | 2.950                                     | 2.051 ± 0.018                             |
| 26.6113                                         | 3.143                                     | 2.152 ± 0.019                             |
| 28.8134                                         | 3.329                                     | 2.250 ± 0.021                             |
| 30.9239                                         | 3.501                                     | 2.337 ± 0.022                             |
| 32.9433                                         | 3.661                                     | 2.415 ± 0.024                             |
| 34.8731                                         | 3.811                                     | 2.486 ± 0.025                             |
| 36.7109                                         | 3.954                                     | 2.552 ± 0.026                             |
| 38.4679                                         | 4.087                                     | 2.611 ± 0.028                             |
| 40.1464                                         | 4.212                                     | 2.665 ± 0.029                             |
| 41.7477                                         | 4.330                                     | 2.715 ± 0.030                             |
| 43.2705                                         | 4.442                                     | 2.763 ± 0.031                             |
| 44.7289                                         | 4.548                                     | 2.805 ± 0.032                             |
| 46.1237                                         | 4.647                                     | 2.843 ± 0.033                             |
| 47.4494                                         | 4.742                                     | 2.880 ± 0.034                             |
| 48.7117                                         | 4.832                                     | 2.914 ± 0.035                             |
| 49.9200                                         | 4.917                                     | 2.946 ± 0.036                             |
| 51.0725                                         | 4.999                                     | 2.976 ± 0.037                             |
| 52.1757                                         | 5.075                                     | 3.003 ± 0.038                             |
| 53.2238                                         | 5.149                                     | 3.029 ± 0.039                             |
| 54.2268                                         | 5.218                                     | 3.053 ± 0.039                             |
| 55.1844                                         | 5.284                                     | 3.076 ± 0.04                              |
| 56.0970                                         | 5.348                                     | 3.097 ± 0.041                             |
| 56.9708                                         | 5.407                                     | 3.117 ± 0.041                             |
| 59.1140                                         | 5.554                                     | 3.164 ± 0.043                             |
| 61.1536                                         | 5.692                                     | 3.207 ± 0.044                             |
| 63.0990                                         | 5.821                                     | 3.245 ± 0.046                             |
| 64.9447                                         | 5.946                                     | 3.282 ± 0.047                             |
| 66.7042                                         | 6.062                                     | 3.314 ± 0.048                             |
| 68.3765                                         | 6.174                                     | 3.345 ± 0.050                             |

**Table S1.** Continued.

| $p$<br>/bar                                    | $\eta^{\text{abs}}$<br>/mmol g <sup>-1</sup> | $\eta^{\text{exc}}$<br>/mmol g <sup>-1</sup> |
|------------------------------------------------|----------------------------------------------|----------------------------------------------|
| $T = -0.0219 \pm 0.006 \text{ }^\circ\text{C}$ |                                              |                                              |
| 69.9725                                        | 6.279                                        | 3.373 $\pm$ 0.051                            |
| 71.4911                                        | 6.377                                        | 3.395 $\pm$ 0.053                            |
| 72.9392                                        | 6.472                                        | 3.419 $\pm$ 0.054                            |
| 74.3203                                        | 6.563                                        | 3.442 $\pm$ 0.055                            |
| 75.6355                                        | 6.650                                        | 3.464 $\pm$ 0.056                            |
| 76.8928                                        | 6.732                                        | 3.483 $\pm$ 0.058                            |
| 78.0879                                        | 6.811                                        | 3.502 $\pm$ 0.058                            |
| 79.2317                                        | 6.884                                        | 3.517 $\pm$ 0.059                            |
| 80.3185                                        | 6.956                                        | 3.534 $\pm$ 0.060                            |
| 81.3590                                        | 7.024                                        | 3.549 $\pm$ 0.061                            |
| 82.3511                                        | 7.090                                        | 3.566 $\pm$ 0.062                            |
| 83.3096                                        | 7.148                                        | 3.574 $\pm$ 0.062                            |
| 84.2134                                        | 7.206                                        | 3.586 $\pm$ 0.063                            |
| 85.0781                                        | 7.262                                        | 3.597 $\pm$ 0.064                            |
| 85.9109                                        | 7.313                                        | 3.606 $\pm$ 0.065                            |
| 86.6986                                        | 7.364                                        | 3.616 $\pm$ 0.066                            |
| $T = 0.096 \pm 0.005 \text{ }^\circ\text{C}$   |                                              |                                              |
| 1.4712                                         | 0.314                                        | 0.262 $\pm$ 0.002                            |
| 3.0178                                         | 0.583                                        | 0.477 $\pm$ 0.002                            |
| 4.5740                                         | 0.824                                        | 0.663 $\pm$ 0.003                            |
| 6.1196                                         | 1.041                                        | 0.824 $\pm$ 0.005                            |
| 7.6384                                         | 1.239                                        | 0.968 $\pm$ 0.006                            |
| 9.1186                                         | 1.422                                        | 1.097 $\pm$ 0.007                            |
| 10.5624                                        | 1.591                                        | 1.213 $\pm$ 0.008                            |
| 11.9575                                        | 1.748                                        | 1.319 $\pm$ 0.009                            |
| 13.3109                                        | 1.894                                        | 1.414 $\pm$ 0.010                            |
| 14.6146                                        | 2.030                                        | 1.502 $\pm$ 0.011                            |
| 15.8744                                        | 2.157                                        | 1.582 $\pm$ 0.012                            |
| 17.0859                                        | 2.277                                        | 1.656 $\pm$ 0.013                            |
| 18.2524                                        | 2.389                                        | 1.724 $\pm$ 0.013                            |
| 19.3727                                        | 2.495                                        | 1.787 $\pm$ 0.014                            |
| 20.4516                                        | 2.594                                        | 1.845 $\pm$ 0.015                            |
| 21.4745                                        | 2.691                                        | 1.902 $\pm$ 0.016                            |
| 22.4655                                        | 2.780                                        | 1.953 $\pm$ 0.016                            |
| 23.4199                                        | 2.863                                        | 1.999 $\pm$ 0.017                            |
| 24.3278                                        | 2.944                                        | 2.044 $\pm$ 0.018                            |
| 25.1987                                        | 3.020                                        | 2.086 $\pm$ 0.018                            |

**Table S1.** Continued.

| $p$<br>/bar                                   | $\eta^{\text{abs}}$<br>/mmol g <sup>-1</sup> | $\eta^{\text{exc}}$<br>/mmol g <sup>-1</sup> |
|-----------------------------------------------|----------------------------------------------|----------------------------------------------|
| $T = 0.096 \pm 0.005 \text{ }^\circ\text{C}$  |                                              |                                              |
| 26.0657                                       | 3.084                                        | 2.116 $\pm$ 0.019                            |
| 26.8636                                       | 3.153                                        | 2.153 $\pm$ 0.019                            |
| 27.6316                                       | 3.218                                        | 2.187 $\pm$ 0.020                            |
| 28.3696                                       | 3.279                                        | 2.219 $\pm$ 0.021                            |
| 29.0745                                       | 3.337                                        | 2.249 $\pm$ 0.021                            |
| 29.7524                                       | 3.392                                        | 2.276 $\pm$ 0.022                            |
| 30.4012                                       | 3.444                                        | 2.303 $\pm$ 0.022                            |
| 31.0224                                       | 3.494                                        | 2.327 $\pm$ 0.022                            |
| 31.6175                                       | 3.541                                        | 2.350 $\pm$ 0.023                            |
| 32.1882                                       | 3.586                                        | 2.372 $\pm$ 0.023                            |
| 32.7319                                       | 3.630                                        | 2.393 $\pm$ 0.024                            |
| 35.0374                                       | 3.808                                        | 2.477 $\pm$ 0.025                            |
| 37.2290                                       | 3.977                                        | 2.555 $\pm$ 0.026                            |
| 39.3277                                       | 4.133                                        | 2.623 $\pm$ 0.028                            |
| 41.3266                                       | 4.281                                        | 2.685 $\pm$ 0.029                            |
| 43.2286                                       | 4.421                                        | 2.744 $\pm$ 0.031                            |
| 45.0449                                       | 4.552                                        | 2.796 $\pm$ 0.032                            |
| $T = 25.071 \pm 0.008 \text{ }^\circ\text{C}$ |                                              |                                              |
| 2.1887                                        | 0.299                                        | 0.229 $\pm$ 0.002                            |
| 4.3988                                        | 0.561                                        | 0.419 $\pm$ 0.003                            |
| 6.5784                                        | 0.797                                        | 0.584 $\pm$ 0.004                            |
| 8.6963                                        | 1.015                                        | 0.733 $\pm$ 0.004                            |
| 10.6961                                       | 1.229                                        | 0.882 $\pm$ 0.005                            |
| 12.6170                                       | 1.433                                        | 1.021 $\pm$ 0.006                            |
| 14.4527                                       | 1.628                                        | 1.155 $\pm$ 0.007                            |
| $T = 25.074 \pm 0.005 \text{ }^\circ\text{C}$ |                                              |                                              |
| 0.6018                                        | 0.087                                        | 0.068 $\pm$ 0.002                            |
| 1.1904                                        | 0.168                                        | 0.130 $\pm$ 0.002                            |
| 2.9116                                        | 0.387                                        | 0.294 $\pm$ 0.003                            |
| 4.6154                                        | 0.585                                        | 0.436 $\pm$ 0.004                            |
| 6.2852                                        | 0.766                                        | 0.563 $\pm$ 0.004                            |
| 7.9128                                        | 0.933                                        | 0.677 $\pm$ 0.004                            |
| 10.4210                                       | 1.176                                        | 0.837 $\pm$ 0.005                            |
| 12.8603                                       | 1.397                                        | 0.977 $\pm$ 0.007                            |
| 15.2217                                       | 1.601                                        | 1.102 $\pm$ 0.007                            |
| 17.4948                                       | 1.791                                        | 1.216 $\pm$ 0.008                            |
| 19.6724                                       | 1.971                                        | 1.321 $\pm$ 0.009                            |

**Table S1.** Continued.

| $p$<br>/bar | $\eta^{\text{abs}}$<br>/mmol g <sup>-1</sup>  | $\eta^{\text{exc}}$<br>/mmol g <sup>-1</sup> |
|-------------|-----------------------------------------------|----------------------------------------------|
|             | $T = 25.074 \pm 0.005 \text{ }^\circ\text{C}$ |                                              |
| 21.7862     | 2.134                                         | 1.412 ± 0.010                                |
| 23.8380     | 2.282                                         | 1.489 ± 0.011                                |
| 25.7688     | 2.429                                         | 1.569 ± 0.012                                |
| 28.4390     | 2.621                                         | 1.668 ± 0.013                                |
| 30.9898     | 2.803                                         | 1.759 ± 0.014                                |
| 33.4398     | 2.970                                         | 1.839 ± 0.015                                |
| 35.7853     | 3.128                                         | 1.912 ± 0.016                                |
| 38.0240     | 3.277                                         | 1.980 ± 0.017                                |
| 40.1629     | 3.417                                         | 2.043 ± 0.018                                |
| 42.2178     | 3.548                                         | 2.098 ± 0.019                                |
| 44.1741     | 3.673                                         | 2.151 ± 0.020                                |
| 46.0508     | 3.789                                         | 2.197 ± 0.021                                |
| 47.8386     | 3.900                                         | 2.242 ± 0.021                                |
| 49.5502     | 4.005                                         | 2.283 ± 0.022                                |
| 51.1839     | 4.105                                         | 2.321 ± 0.023                                |
| 52.7506     | 4.199                                         | 2.355 ± 0.024                                |
| 54.2442     | 4.288                                         | 2.388 ± 0.024                                |
| 56.3853     | 4.416                                         | 2.433 ± 0.025                                |
| 58.4225     | 4.537                                         | 2.476 ± 0.026                                |
| 60.3727     | 4.652                                         | 2.515 ± 0.027                                |
| 62.2321     | 4.761                                         | 2.552 ± 0.028                                |
| 64.0200     | 4.862                                         | 2.583 ± 0.029                                |
| 65.7160     | 4.961                                         | 2.615 ± 0.029                                |
| 67.3472     | 5.051                                         | 2.641 ± 0.030                                |
| 68.9009     | 5.139                                         | 2.667 ± 0.031                                |
| 70.3972     | 5.219                                         | 2.688 ± 0.032                                |
| 71.8035     | 5.301                                         | 2.714 ± 0.032                                |
| 73.1665     | 5.375                                         | 2.733 ± 0.033                                |
| 74.4377     | 5.455                                         | 2.762 ± 0.034                                |
| 75.6680     | 5.525                                         | 2.782 ± 0.034                                |
| 76.8533     | 5.590                                         | 2.799 ± 0.035                                |
| 77.9760     | 5.654                                         | 2.818 ± 0.035                                |
| 79.0576     | 5.714                                         | 2.834 ± 0.036                                |
| 80.0923     | 5.770                                         | 2.848 ± 0.036                                |
| 81.0836     | 5.823                                         | 2.861 ± 0.037                                |
| 82.0270     | 5.876                                         | 2.874 ± 0.037                                |
| 82.9343     | 5.924                                         | 2.886 ± 0.038                                |

**Table S1.** Continued.

| $p$<br>/bar                                    | $\eta^{\text{abs}}$<br>/mmol g <sup>-1</sup> | $\eta^{\text{exc}}$<br>/mmol g <sup>-1</sup> |
|------------------------------------------------|----------------------------------------------|----------------------------------------------|
| $T = 25.074 \pm 0.005 \text{ } ^\circ\text{C}$ |                                              |                                              |
| 83.8025                                        | 5.970                                        | 2.896 ± 0.038                                |
| 84.6024                                        | 6.022                                        | 2.916 ± 0.038                                |
| 85.3828                                        | 6.069                                        | 2.930 ± 0.039                                |
| 86.1467                                        | 6.107                                        | 2.937 ± 0.039                                |
| 86.8815                                        | 6.144                                        | 2.943 ± 0.039                                |
| 87.5743                                        | 6.181                                        | 2.952 ± 0.040                                |
| 88.2367                                        | 6.217                                        | 2.960 ± 0.040                                |
| 88.8569                                        | 6.255                                        | 2.973 ± 0.040                                |
| 90.1854                                        | 6.327                                        | 2.989 ± 0.041                                |
| 91.4525                                        | 6.395                                        | 3.005 ± 0.042                                |
| 92.6699                                        | 6.459                                        | 3.018 ± 0.042                                |
| $T = 50.24 \pm 0.01 \text{ } ^\circ\text{C}$   |                                              |                                              |
| 2.8858                                         | 0.280                                        | 0.175 ± 0.002                                |
| 5.7391                                         | 0.529                                        | 0.320 ± 0.003                                |
| 8.5108                                         | 0.757                                        | 0.446 ± 0.004                                |
| 11.1968                                        | 0.966                                        | 0.556 ± 0.005                                |
| 13.7846                                        | 1.160                                        | 0.655 ± 0.006                                |
| 16.2728                                        | 1.342                                        | 0.752 ± 0.007                                |
| 18.8290                                        | 1.484                                        | 0.799 ± 0.008                                |
| 21.1826                                        | 1.637                                        | 0.864 ± 0.008                                |
| 23.3988                                        | 1.789                                        | 0.933 ± 0.009                                |
| 25.5418                                        | 1.929                                        | 0.992 ± 0.010                                |
| 27.5969                                        | 2.060                                        | 1.045 ± 0.011                                |
| 29.5545                                        | 2.186                                        | 1.101 ± 0.012                                |
| 31.5363                                        | 2.286                                        | 1.127 ± 0.013                                |
| 33.3648                                        | 2.395                                        | 1.166 ± 0.013                                |
| 35.1229                                        | 2.497                                        | 1.200 ± 0.014                                |
| 36.7940                                        | 2.596                                        | 1.235 ± 0.015                                |
| 38.3595                                        | 2.697                                        | 1.275 ± 0.015                                |
| 39.8914                                        | 2.785                                        | 1.306 ± 0.016                                |
| 41.4246                                        | 2.856                                        | 1.319 ± 0.017                                |
| 42.8411                                        | 2.935                                        | 1.342 ± 0.017                                |
| 44.1879                                        | 3.012                                        | 1.366 ± 0.017                                |
| 45.4863                                        | 3.082                                        | 1.386 ± 0.018                                |
| 46.6807                                        | 3.160                                        | 1.416 ± 0.019                                |
| 47.8430                                        | 3.229                                        | 1.441 ± 0.019                                |
| 49.0536                                        | 3.275                                        | 1.440 ± 0.019                                |

**Table S1.** Continued.

| $p$<br>/bar | $\eta^{\text{abs}}$<br>/mmol g <sup>-1</sup>   | $\eta^{\text{exc}}$<br>/mmol g <sup>-1</sup> |
|-------------|------------------------------------------------|----------------------------------------------|
|             | $T = 50.24 \pm 0.01 \text{ } ^\circ\text{C}$   |                                              |
| 50.1395     | 3.334                                          | $1.457 \pm 0.020$                            |
| 51.1834     | 3.390                                          | $1.471 \pm 0.020$                            |
| 52.1412     | 3.452                                          | $1.494 \pm 0.021$                            |
| 53.0668     | 3.508                                          | $1.514 \pm 0.021$                            |
| 53.9456     | 3.564                                          | $1.534 \pm 0.021$                            |
| 54.7872     | 3.617                                          | $1.556 \pm 0.022$                            |
| 55.7719     | 3.629                                          | $1.530 \pm 0.022$                            |
| 56.5715     | 3.672                                          | $1.541 \pm 0.023$                            |
| 57.3418     | 3.712                                          | $1.550 \pm 0.023$                            |
| 58.0743     | 3.751                                          | $1.560 \pm 0.023$                            |
|             | $T = 50.241 \pm 0.005 \text{ } ^\circ\text{C}$ |                                              |
| 3.2712      | 0.313                                          | $0.216 \pm 0.002$                            |
| 6.4908      | 0.592                                          | $0.400 \pm 0.003$                            |
| 9.6352      | 0.844                                          | $0.557 \pm 0.005$                            |
| 12.6908     | 1.076                                          | $0.696 \pm 0.007$                            |
| 15.6515     | 1.286                                          | $0.816 \pm 0.008$                            |
| 18.4746     | 1.487                                          | $0.931 \pm 0.010$                            |
| 21.2209     | 1.667                                          | $1.026 \pm 0.011$                            |
| 23.8189     | 1.843                                          | $1.121 \pm 0.013$                            |
| 26.3295     | 2.005                                          | $1.204 \pm 0.014$                            |
| 28.8081     | 2.145                                          | $1.266 \pm 0.016$                            |
| 31.1274     | 2.287                                          | $1.335 \pm 0.017$                            |
| 33.3372     | 2.424                                          | $1.401 \pm 0.018$                            |
| 35.4432     | 2.554                                          | $1.464 \pm 0.019$                            |
| 37.4517     | 2.679                                          | $1.524 \pm 0.020$                            |

**Table S2.** Carbon dioxide adsorption data for the 22 Å pore size silica.

| $p$<br>/bar                                    | $n^{\text{abs}}$<br>/mmol g <sup>-1</sup> | $n^{\text{exc}}$<br>/mmol g <sup>-1</sup> |
|------------------------------------------------|-------------------------------------------|-------------------------------------------|
| $T = -0.003 \pm 0.008 \text{ } ^\circ\text{C}$ |                                           |                                           |
| 0.4944                                         | 1.126                                     | 1.102 ± 0.009                             |
| 1.1402                                         | 1.904                                     | 1.849 ± 0.012                             |
| 1.7719                                         | 2.462                                     | 2.376 ± 0.020                             |
| 2.3373                                         | 2.868                                     | 2.754 ± 0.026                             |
| 2.8100                                         | 3.173                                     | 3.036 ± 0.029                             |
| 3.2037                                         | 3.399                                     | 3.242 ± 0.035                             |
| 3.5231                                         | 3.570                                     | 3.397 ± 0.047                             |
| 3.7781                                         | 3.701                                     | 3.515 ± 0.053                             |
| 3.9733                                         | 3.806                                     | 3.610 ± 0.057                             |
| 4.1340                                         | 3.884                                     | 3.680 ± 0.060                             |
| 4.2604                                         | 3.943                                     | 3.733 ± 0.065                             |
| 4.3527                                         | 3.994                                     | 3.779 ± 0.071                             |
| 4.4307                                         | 4.030                                     | 3.811 ± 0.079                             |
| 4.4957                                         | 4.06                                      | 3.83 ± 0.19                               |
| 4.5469                                         | 4.08                                      | 3.85 ± 0.27                               |
| 4.5844                                         | 4.09                                      | 3.87 ± 0.27                               |
| $T = -0.160 \pm 0.005 \text{ } ^\circ\text{C}$ |                                           |                                           |
| 0.1647                                         | 0.577                                     | 0.569 ± 0.007                             |
| 0.4028                                         | 0.996                                     | 0.977 ± 0.006                             |
| 0.6225                                         | 1.324                                     | 1.294 ± 0.008                             |
| 0.8283                                         | 1.573                                     | 1.533 ± 0.013                             |
| 1.0012                                         | 1.772                                     | 1.724 ± 0.018                             |
| 1.6829                                         | 2.385                                     | 2.303 ± 0.021                             |
| 3.6745                                         | 3.693                                     | 3.513 ± 0.036                             |
| 5.5427                                         | 4.503                                     | 4.227 ± 0.054                             |
| 7.0751                                         | 5.052                                     | 4.695 ± 0.070                             |
| 8.2892                                         | 5.432                                     | 5.011 ± 0.083                             |
| 9.2403                                         | 5.699                                     | 5.225 ± 0.094                             |
| 9.9626                                         | 5.90                                      | 5.38 ± 0.10                               |
| $T = 25.063 \pm 0.005 \text{ } ^\circ\text{C}$ |                                           |                                           |
| 8.8023                                         | 3.753                                     | 3.348 ± 0.015                             |
| 17.0866                                        | 5.324                                     | 4.499 ± 0.033                             |
| 23.1683                                        | 6.234                                     | 5.069 ± 0.044                             |
| 27.5162                                        | 6.806                                     | 5.380 ± 0.055                             |
| 30.5997                                        | 7.203                                     | 5.578 ± 0.064                             |
| 32.8074                                        | 7.480                                     | 5.707 ± 0.068                             |
| 34.4205                                        | 7.659                                     | 5.773 ± 0.075                             |



**Table S2.** Continued.

| $p$<br>/bar                                    | $\eta^{\text{abs}}$<br>/mmol g <sup>-1</sup> | $\eta^{\text{exc}}$<br>/mmol g <sup>-1</sup> |
|------------------------------------------------|----------------------------------------------|----------------------------------------------|
| $T = 25.126 \pm 0.005 \text{ } ^\circ\text{C}$ |                                              |                                              |
| 1.1153                                         | 1.041                                        | $0.992 \pm 0.011$                            |
| 2.2819                                         | 1.720                                        | $1.618 \pm 0.022$                            |
| 3.3298                                         | 2.177                                        | $2.028 \pm 0.030$                            |
| 4.1811                                         | 2.512                                        | $2.325 \pm 0.038$                            |
| 4.8806                                         | 2.747                                        | $2.528 \pm 0.044$                            |
| 5.4395                                         | 2.916                                        | $2.671 \pm 0.052$                            |
| 6.4208                                         | 3.211                                        | $2.920 \pm 0.062$                            |
| 7.1986                                         | 3.421                                        | $3.093 \pm 0.069$                            |
| 8.1592                                         | 3.660                                        | $3.286 \pm 0.076$                            |
| 8.8862                                         | 3.842                                        | $3.433 \pm 0.084$                            |
| 9.4553                                         | 3.970                                        | $3.534 \pm 0.094$                            |
| 9.8855                                         | 4.07                                         | $3.61 \pm 0.11$                              |
| 10.2253                                        | 4.14                                         | $3.66 \pm 0.11$                              |
| 10.4758                                        | 4.19                                         | $3.70 \pm 0.11$                              |
| $T = 50.118 \pm 0.009 \text{ } ^\circ\text{C}$ |                                              |                                              |
| 7.3743                                         | 2.215                                        | $1.908 \pm 0.012$                            |
| 13.8680                                        | 3.319                                        | $2.725 \pm 0.023$                            |
| 18.8626                                        | 3.986                                        | $3.160 \pm 0.032$                            |
| 22.5996                                        | 4.416                                        | $3.409 \pm 0.040$                            |
| 25.4181                                        | 4.691                                        | $3.544 \pm 0.047$                            |
| 27.4863                                        | 4.888                                        | $3.634 \pm 0.052$                            |
| 29.0142                                        | 5.026                                        | $3.692 \pm 0.062$                            |
| $T = 50.149 \pm 0.005 \text{ } ^\circ\text{C}$ |                                              |                                              |
| 13.4686                                        | 3.144                                        | $2.568 \pm 0.028$                            |
| 24.6418                                        | 4.523                                        | $3.415 \pm 0.079$                            |
| 33.1389                                        | 5.41                                         | $3.86 \pm 0.11$                              |
| 39.6268                                        | 6.02                                         | $4.09 \pm 0.12$                              |
| 44.3985                                        | 6.43                                         | $4.21 \pm 0.30$                              |
| 48.6582                                        | 6.74                                         | $4.24 \pm 0.30$                              |
| 51.7113                                        | 6.99                                         | $4.28 \pm 0.14$                              |
| 53.9346                                        | 7.18                                         | $4.31 \pm 0.13$                              |
| 55.5717                                        | 7.30                                         | $4.31 \pm 0.13$                              |
| 56.7508                                        | 7.40                                         | $4.32 \pm 0.16$                              |
| 57.6067                                        | 7.48                                         | $4.33 \pm 0.20$                              |

**Table S3.** Hydrogen sulfide adsorption data for the 22 Å pore size silica.

| $p$<br>/bar               | $n^{\text{abs}}$<br>/mmol g <sup>-1</sup> | $n^{\text{exc}}$<br>/mmol g <sup>-1</sup> |
|---------------------------|-------------------------------------------|-------------------------------------------|
| $T = 0.124 \pm 0.005$ °C  |                                           |                                           |
| 0.0396                    | 0.641                                     | $0.639 \pm 0.007$                         |
| 0.0904                    | 1.173                                     | $1.169 \pm 0.007$                         |
| 0.1716                    | 1.856                                     | $1.848 \pm 0.007$                         |
| 0.3112                    | 2.388                                     | $2.373 \pm 0.006$                         |
| 0.4586                    | 2.814                                     | $2.792 \pm 0.009$                         |
| 0.5934                    | 3.160                                     | $3.132 \pm 0.014$                         |
| 0.8856                    | 3.786                                     | $3.743 \pm 0.016$                         |
| $T = 0.100 \pm 0.008$ °C  |                                           |                                           |
| 0.0824                    | 0.910                                     | $0.906 \pm 0.009$                         |
| 0.2071                    | 1.646                                     | $1.636 \pm 0.009$                         |
| 0.3640                    | 2.464                                     | $2.447 \pm 0.009$                         |
| 0.6517                    | 3.194                                     | $3.162 \pm 0.011$                         |
| 0.9703                    | 3.746                                     | $3.699 \pm 0.014$                         |
| 1.3600                    | 4.306                                     | $4.24 \pm 0.02$                           |
| 1.7190                    | 4.734                                     | $4.65 \pm 0.026$                          |
| 2.0208                    | 5.439                                     | $5.34 \pm 0.026$                          |
| 2.4892                    | 5.931                                     | $5.809 \pm 0.031$                         |
| 2.8946                    | 6.308                                     | $6.165 \pm 0.041$                         |
| 3.3089                    | 6.659                                     | $6.495 \pm 0.044$                         |
| 3.6277                    | 6.947                                     | $6.766 \pm 0.048$                         |
| 3.8998                    | 7.165                                     | $6.97 \pm 0.052$                          |
| $T = 25.122 \pm 0.005$ °C |                                           |                                           |
| 0.3651                    | 1.245                                     | $1.229 \pm 0.005$                         |
| 0.9520                    | 2.121                                     | $2.079 \pm 0.011$                         |
| 1.5525                    | 2.767                                     | $2.698 \pm 0.016$                         |
| 2.7351                    | 3.718                                     | $3.595 \pm 0.025$                         |
| 3.8436                    | 4.373                                     | $4.199 \pm 0.035$                         |
| 4.7643                    | 4.856                                     | $4.639 \pm 0.043$                         |
| $T = 25.115 \pm 0.005$ °C |                                           |                                           |
| 0.0874                    | 0.434                                     | $0.43 \pm 0.006$                          |
| 0.1770                    | 0.790                                     | $0.782 \pm 0.004$                         |
| 0.2964                    | 1.136                                     | $1.123 \pm 0.005$                         |
| 0.4166                    | 1.411                                     | $1.393 \pm 0.011$                         |
| 0.5337                    | 1.629                                     | $1.606 \pm 0.014$                         |
| 0.6374                    | 1.805                                     | $1.777 \pm 0.021$                         |
| 0.8537                    | 2.114                                     | $2.076 \pm 0.022$                         |
| 1.0505                    | 2.354                                     | $2.308 \pm 0.021$                         |

**Table S3.** Continued.

| $p$<br>/bar           | $\eta^{\text{abs}}$<br>/mmol g <sup>-1</sup> | $\eta^{\text{exc}}$<br>/mmol g <sup>-1</sup> |
|-----------------------|----------------------------------------------|----------------------------------------------|
| T = 50.179 ± 0.006 °C |                                              |                                              |
| 0.5883                | 0.894                                        | 0.87 ± 0.006                                 |
| 1.2949                | 1.507                                        | 1.455 ± 0.011                                |
| 1.9486                | 1.954                                        | 1.875 ± 0.016                                |
| 2.5206                | 2.281                                        | 2.177 ± 0.022                                |
| 2.9972                | 2.526                                        | 2.402 ± 0.026                                |
| 3.3898                | 2.707                                        | 2.566 ± 0.031                                |
| 3.7022                | 2.845                                        | 2.692 ± 0.041                                |
| 3.9532                | 2.950                                        | 2.786 ± 0.052                                |
| 4.4015                | 3.118                                        | 2.935 ± 0.052                                |
| 4.7516                | 3.246                                        | 3.048 ± 0.045                                |
| 5.0214                | 3.345                                        | 3.136 ± 0.051                                |
| 5.3662                | 3.457                                        | 3.233 ± 0.057                                |
| 5.6331                | 3.542                                        | 3.306 ± 0.053                                |
| 5.8306                | 3.611                                        | 3.366 ± 0.059                                |
| 50.173 ± 0.005 °C     |                                              |                                              |
| 0.1068                | 0.250                                        | 0.245 ± 0.007                                |
| 0.2325                | 0.437                                        | 0.427 ± 0.004                                |
| 0.3272                | 0.594                                        | 0.58 ± 0.005                                 |
| 0.4125                | 0.719                                        | 0.702 ± 0.007                                |
| 0.5324                | 0.854                                        | 0.832 ± 0.008                                |
| 0.6433                | 0.955                                        | 0.928 ± 0.008                                |
| 0.7211                | 1.041                                        | 1.012 ± 0.011                                |
| 0.7882                | 1.109                                        | 1.077 ± 0.019                                |
| 0.8527                | 1.159                                        | 1.124 ± 0.022                                |
| 0.8936                | 1.203                                        | 1.166 ± 0.031                                |
| 0.9385                | 1.232                                        | 1.194 ± 0.052                                |

**Table S4.** Methane adsorption data for the 30 Å pore size silica.

| $p$<br>/bar                                    | $n^{\text{abs}}$<br>/mmol g <sup>-1</sup> | $n^{\text{exc}}$<br>/mmol g <sup>-1</sup> |
|------------------------------------------------|-------------------------------------------|-------------------------------------------|
| $T = -0.044 \pm 0.005 \text{ } ^\circ\text{C}$ |                                           |                                           |
| 18.1273                                        | 1.86                                      | $1.71 \pm 0.12$                           |
| 31.1290                                        | 2.91                                      | $2.48 \pm 0.21$                           |
| 40.3358                                        | 3.62                                      | $2.98 \pm 0.29$                           |
| 46.9120                                        | 4.11                                      | $3.34 \pm 0.34$                           |
| $T = 0.08 \pm 0.01 \text{ } ^\circ\text{C}$    |                                           |                                           |
| 8.1423                                         | 0.965                                     | $0.768 \pm 0.054$                         |
| 14.2731                                        | 1.54                                      | $1.18 \pm 0.10$                           |
| 18.7675                                        | 1.92                                      | $1.46 \pm 0.13$                           |
| 22.0633                                        | 2.19                                      | $1.64 \pm 0.15$                           |
| 24.4820                                        | 2.39                                      | $1.77 \pm 0.17$                           |
| 26.2558                                        | 2.53                                      | $1.87 \pm 0.18$                           |
| $T = 25.004 \pm 0.008 \text{ } ^\circ\text{C}$ |                                           |                                           |
| 20.3106                                        | 1.60                                      | $1.14 \pm 0.13$                           |
| 34.9347                                        | 2.56                                      | $1.75 \pm 0.22$                           |
| 45.4192                                        | 3.21                                      | $2.14 \pm 0.29$                           |
| 53.0032                                        | 3.67                                      | $2.41 \pm 0.35$                           |
| 58.5037                                        | 4.01                                      | $2.6 \pm 0.38$                            |
| 62.5347                                        | 4.25                                      | $2.73 \pm 0.41$                           |
| $T = 25.016 \pm 0.008 \text{ } ^\circ\text{C}$ |                                           |                                           |
| 8.0656                                         | 0.707                                     | $0.529 \pm 0.049$                         |
| 14.0623                                        | 1.162                                     | $0.848 \pm 0.086$                         |
| 18.4782                                        | 1.48                                      | $1.06 \pm 0.11$                           |
| 21.7360                                        | 1.70                                      | $1.21 \pm 0.13$                           |
| $T = 50.093 \pm 0.005 \text{ } ^\circ\text{C}$ |                                           |                                           |
| 14.2480                                        | 0.943                                     | $0.652 \pm 0.08$                          |
| 24.6950                                        | 1.55                                      | $1.03 \pm 0.14$                           |
| 32.4557                                        | 1.91                                      | $1.23 \pm 0.19$                           |
| 40.6126                                        | 2.35                                      | $1.49 \pm 0.23$                           |
| 46.5815                                        | 2.67                                      | $1.67 \pm 0.27$                           |
| 57.0624                                        | 3.21                                      | $1.98 \pm 0.34$                           |
| $T = 50.10 \pm 0.02 \text{ } ^\circ\text{C}$   |                                           |                                           |
| 6.8654                                         | 0.465                                     | $0.325 \pm 0.038$                         |
| 11.9486                                        | 0.775                                     | $0.531 \pm 0.067$                         |
| 15.6840                                        | 1.009                                     | $0.687 \pm 0.088$                         |

**Table S5.** Carbon dioxide adsorption data for the 30 Å pore size silica

| $p$<br>/bar               | $n^{\text{abs}}$<br>/mmol g <sup>-1</sup> | $n^{\text{exc}}$<br>/mmol g <sup>-1</sup> |
|---------------------------|-------------------------------------------|-------------------------------------------|
| $T = 0.04 \pm 0.03$ °C    |                                           |                                           |
| 2.4324                    | 1.780                                     | 1.721 ± 0.017                             |
| 5.1936                    | 2.651                                     | 2.523 ± 0.036                             |
| 7.4110                    | 3.211                                     | 3.026 ± 0.051                             |
| 9.1468                    | 3.575                                     | 3.342 ± 0.064                             |
| 11.8971                   | 4.156                                     | 3.847 ± 0.085                             |
| $T = 0.00 \pm 0.01$ °C    |                                           |                                           |
| 1.0814                    | 1.132                                     | 1.106 ± 0.008                             |
| 2.4150                    | 1.766                                     | 1.707 ± 0.017                             |
| 3.5783                    | 2.028                                     | 1.941 ± 0.025                             |
| 4.5216                    | 2.312                                     | 2.201 ± 0.032                             |
| $T = 25.091 \pm 0.005$ °C |                                           |                                           |
| 9.6686                    | 2.552                                     | 2.33 ± 0.061                              |
| 17.7088                   | 3.69                                      | 3.26 ± 0.12                               |
| 26.2619                   | 4.74                                      | 4.08 ± 0.18                               |
| 32.0176                   | 5.48                                      | 4.62 ± 0.23                               |
| 37.1108                   | 6.13                                      | 5.10 ± 0.28                               |
| $T = 25.12 \pm 0.02$ °C   |                                           |                                           |
| 2.6221                    | 1.169                                     | 1.111 ± 0.017                             |
| 5.1777                    | 1.782                                     | 1.666 ± 0.032                             |
| 7.2219                    | 2.186                                     | 2.023 ± 0.045                             |
| 8.7936                    | 2.458                                     | 2.257 ± 0.055                             |
| 14.7918                   | 3.36                                      | 3.01 ± 0.10                               |
| $T = 50.165 \pm 0.008$ °C |                                           |                                           |
| 20.1365                   | 2.88                                      | 2.44 ± 0.12                               |
| 35.2439                   | 4.35                                      | 3.52 ± 0.23                               |
| 44.8220                   | 4.91                                      | 3.8 ± 0.31                                |
| 51.1695                   | 5.32                                      | 3.99 ± 0.37                               |
| 55.7434                   | 5.58                                      | 4.09 ± 0.43                               |
| $T = 50.148 \pm 0.008$ °C |                                           |                                           |
| 5.1188                    | 1.123                                     | 1.018 ± 0.029                             |
| 9.4054                    | 1.727                                     | 1.531 ± 0.054                             |
| 12.6966                   | 2.101                                     | 1.833 ± 0.073                             |
| 15.1424                   | 2.360                                     | 2.036 ± 0.089                             |
| 16.9325                   | 2.55                                      | 2.18 ± 0.10                               |
| 18.2463                   | 2.69                                      | 2.29 ± 0.11                               |

**Table S6.** Hydrogen sulfide adsorption data for the 30 Å pore size silica

| $p$<br>/bar               | $n^{\text{abs}}$<br>/mmol g <sup>-1</sup> | $n^{\text{exc}}$<br>/mmol g <sup>-1</sup> |
|---------------------------|-------------------------------------------|-------------------------------------------|
| $T = 0.014 \pm 0.005$ °C  |                                           |                                           |
| 0.0967                    | 0.629                                     | 0.627 ± 0.004                             |
| 0.2935                    | 1.091                                     | 1.084 ± 0.009                             |
| 0.5205                    | 1.435                                     | 1.423 ± 0.01                              |
| 0.7566                    | 1.686                                     | 1.668 ± 0.015                             |
| 0.9625                    | 1.880                                     | 1.856 ± 0.021                             |
| 1.4077                    | 2.228                                     | 2.194 ± 0.026                             |
| 1.7904                    | 2.488                                     | 2.445 ± 0.031                             |
| 2.1817                    | 2.731                                     | 2.678 ± 0.037                             |
| 2.5729                    | 2.972                                     | 2.909 ± 0.043                             |
| 2.9236                    | 3.175                                     | 3.103 ± 0.051                             |
| 3.1920                    | 3.338                                     | 3.259 ± 0.06                              |
| 3.4024                    | 3.467                                     | 3.383 ± 0.068                             |
| 3.6569                    | 3.618                                     | 3.528 ± 0.071                             |
| 3.8473                    | 3.742                                     | 3.647 ± 0.074                             |
| 4.0048                    | 3.835                                     | 3.736 ± 0.096                             |
| $T = 0.017 \pm 0.005$ °C  |                                           |                                           |
| 0.1226                    | 0.665                                     | 0.662 ± 0.004                             |
| 0.3329                    | 1.161                                     | 1.153 ± 0.006                             |
| 0.5992                    | 1.517                                     | 1.502 ± 0.011                             |
| 0.8616                    | 1.778                                     | 1.758 ± 0.013                             |
| 1.0791                    | 1.985                                     | 1.959 ± 0.020                             |
| $T = 25.001 \pm 0.005$ °C |                                           |                                           |
| 0.7912                    | 1.021                                     | 1.004 ± 0.011                             |
| 1.8055                    | 1.651                                     | 1.611 ± 0.023                             |
| 2.7602                    | 2.064                                     | 2.002 ± 0.034                             |
| 3.5521                    | 2.354                                     | 2.275 ± 0.044                             |
| 4.1705                    | 2.576                                     | 2.482 ± 0.052                             |
| 4.6707                    | 2.733                                     | 2.627 ± 0.059                             |
| 5.0387                    | 2.862                                     | 2.748 ± 0.068                             |
| 6.1433                    | 3.191                                     | 3.05 ± 0.082                              |
| 6.9732                    | 3.446                                     | 3.285 ± 0.090                             |
| 7.5959                    | 3.65                                      | 3.47 ± 0.10                               |
| 8.0795                    | 3.80                                      | 3.61 ± 0.11                               |
| $T = 25.064 \pm 0.005$ °C |                                           |                                           |
| 0.1651                    | 0.399                                     | 0.396 ± 0.005                             |
| 0.3895                    | 0.684                                     | 0.676 ± 0.008                             |
| 0.6092                    | 0.896                                     | 0.882 ± 0.011                             |

**Table S6.** Continued.

| $p$<br>/bar | $\eta^{\text{abs}}$<br>/mmol g <sup>-1</sup>  | $\eta^{\text{exc}}$<br>/mmol g <sup>-1</sup> |
|-------------|-----------------------------------------------|----------------------------------------------|
|             | $T = 25.064 \pm 0.005 \text{ }^\circ\text{C}$ |                                              |
| 0.8083      | 1.055                                         | $1.037 \pm 0.013$                            |
| 0.9863      | 1.172                                         | $1.151 \pm 0.016$                            |
| 1.1274      | 1.265                                         | $1.241 \pm 0.017$                            |
|             | $T = 50.161 \pm 0.005 \text{ }^\circ\text{C}$ |                                              |
| 1.2073      | 0.796                                         | $0.772 \pm 0.014$                            |
| 2.4928      | 1.265                                         | $1.214 \pm 0.028$                            |
| 3.6014      | 1.572                                         | $1.498 \pm 0.041$                            |
| 4.4863      | 1.788                                         | $1.696 \pm 0.052$                            |
| 5.1529      | 1.956                                         | $1.85 \pm 0.061$                             |
| 5.6658      | 2.081                                         | $1.963 \pm 0.068$                            |
|             | $T = 50.152 \pm 0.005 \text{ }^\circ\text{C}$ |                                              |
| 0.7199      | 0.581                                         | $0.566 \pm 0.010$                            |
| 2.0197      | 1.124                                         | $1.083 \pm 0.023$                            |
